# Supplementary material
Source: PubMed Central journal article supplement (PMC3650613)

Figure 1A

[Common.Links.ClickHereToDownloadHighResolutionImage](#)

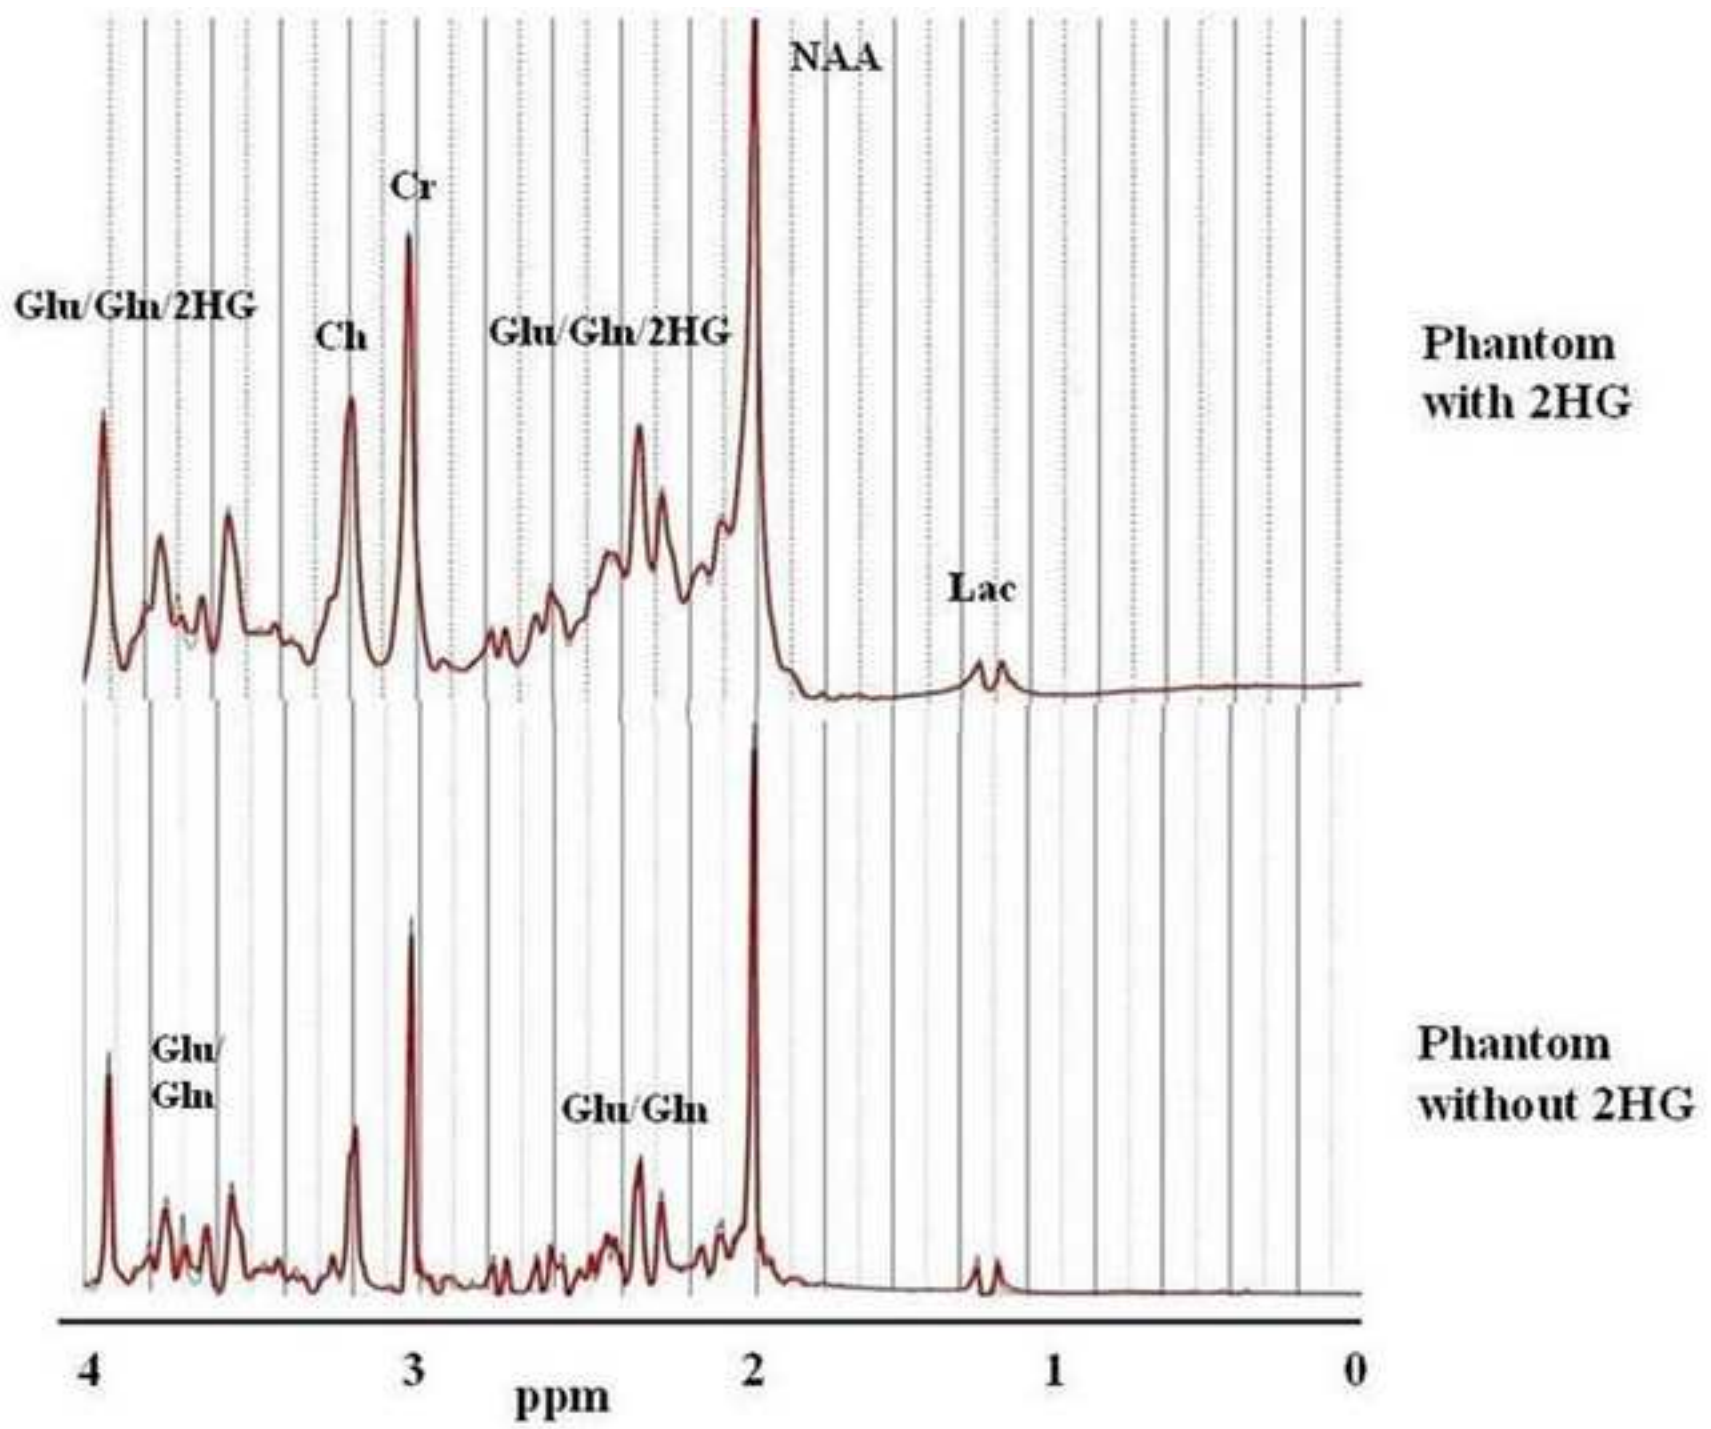

Figure 1B

[Common.Links.ClickHereToDownloadHighResolutionImage](#)

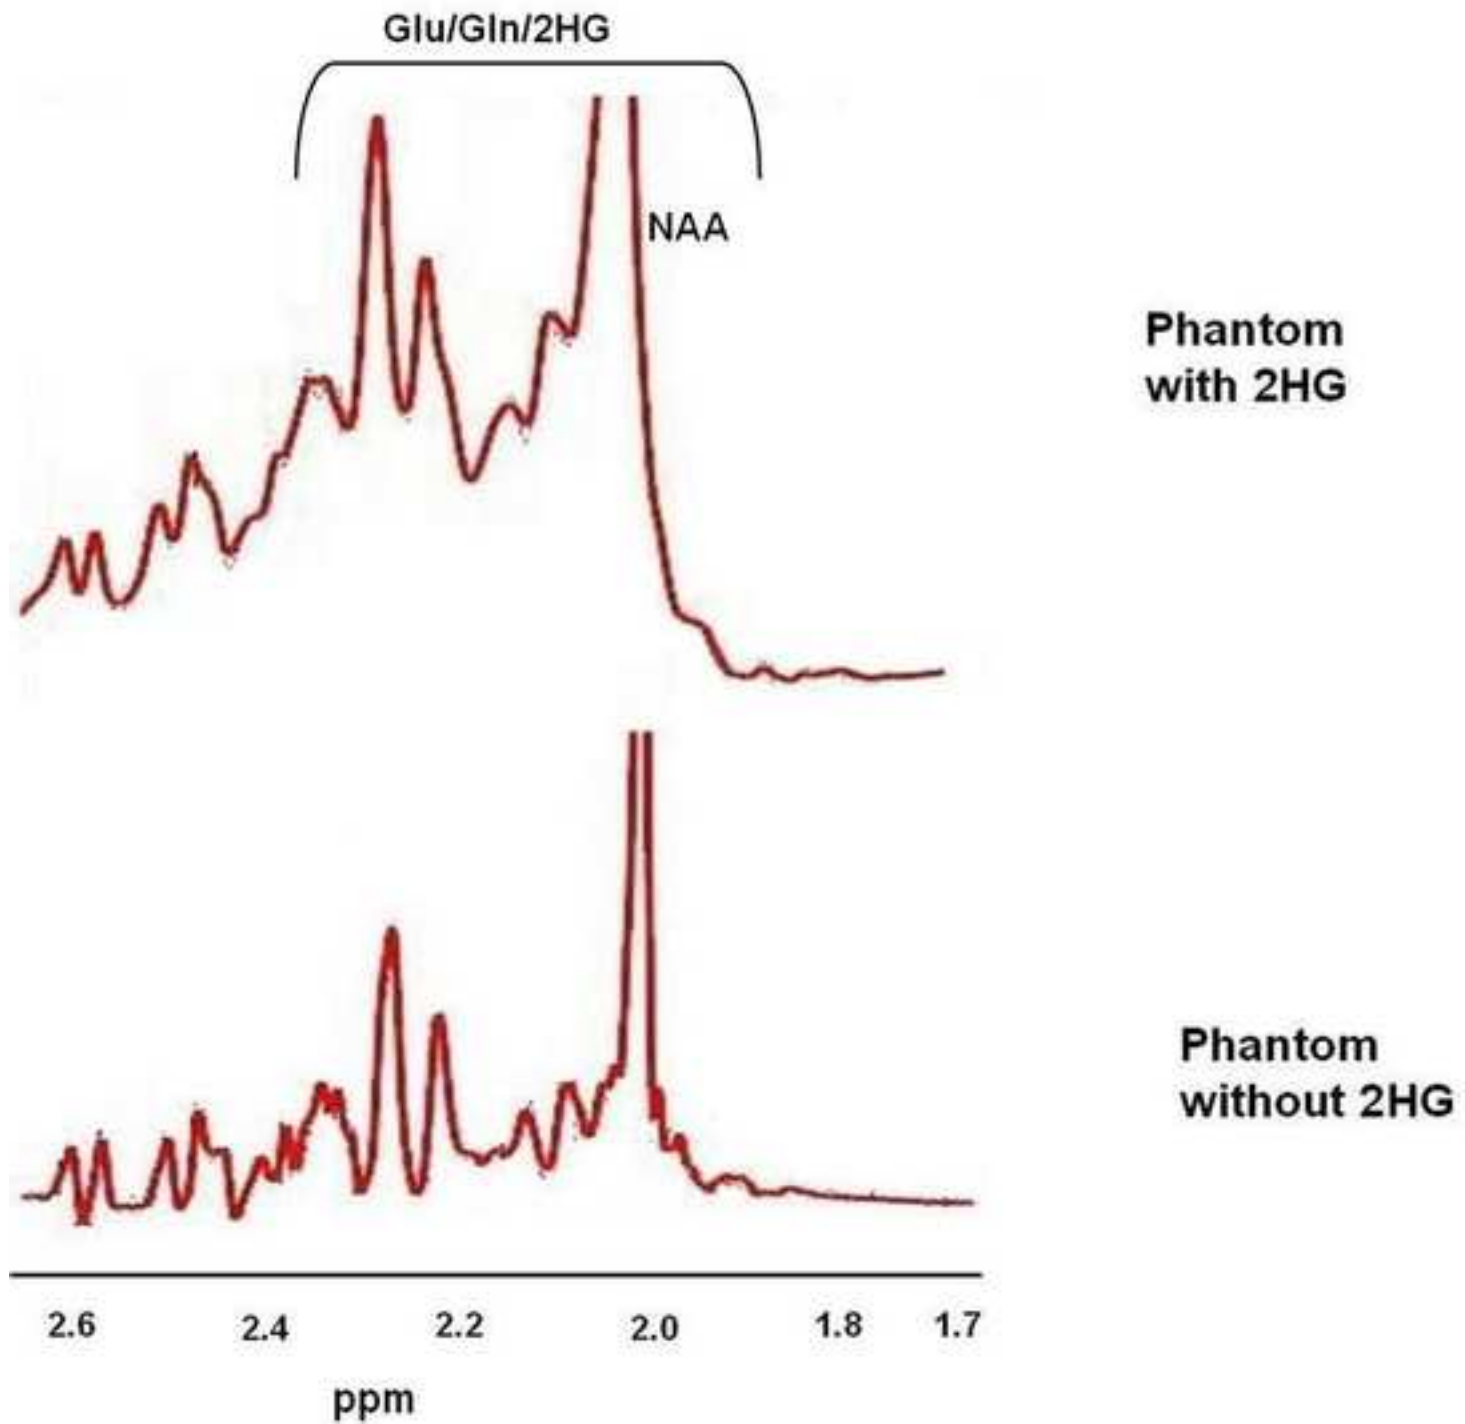

Figure 1C  
[Common.Links.ClickHereToDownloadHighResolutionImage](#)

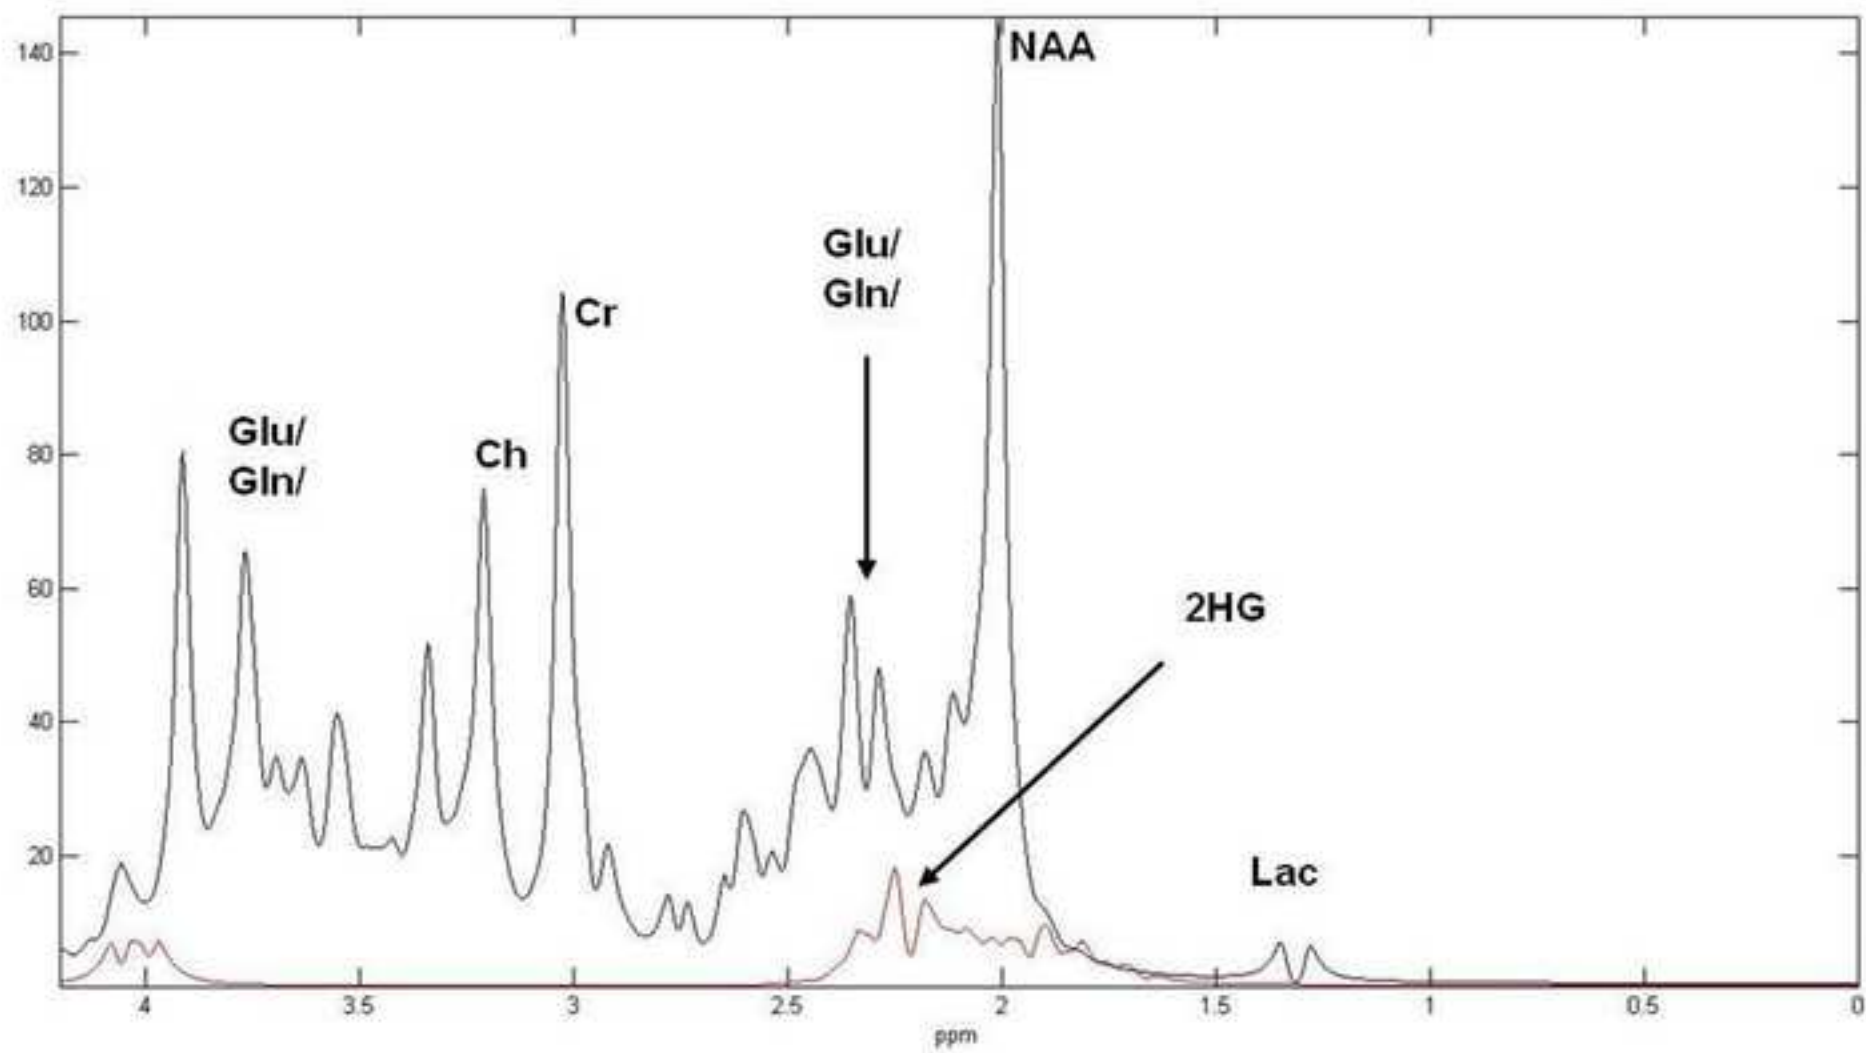

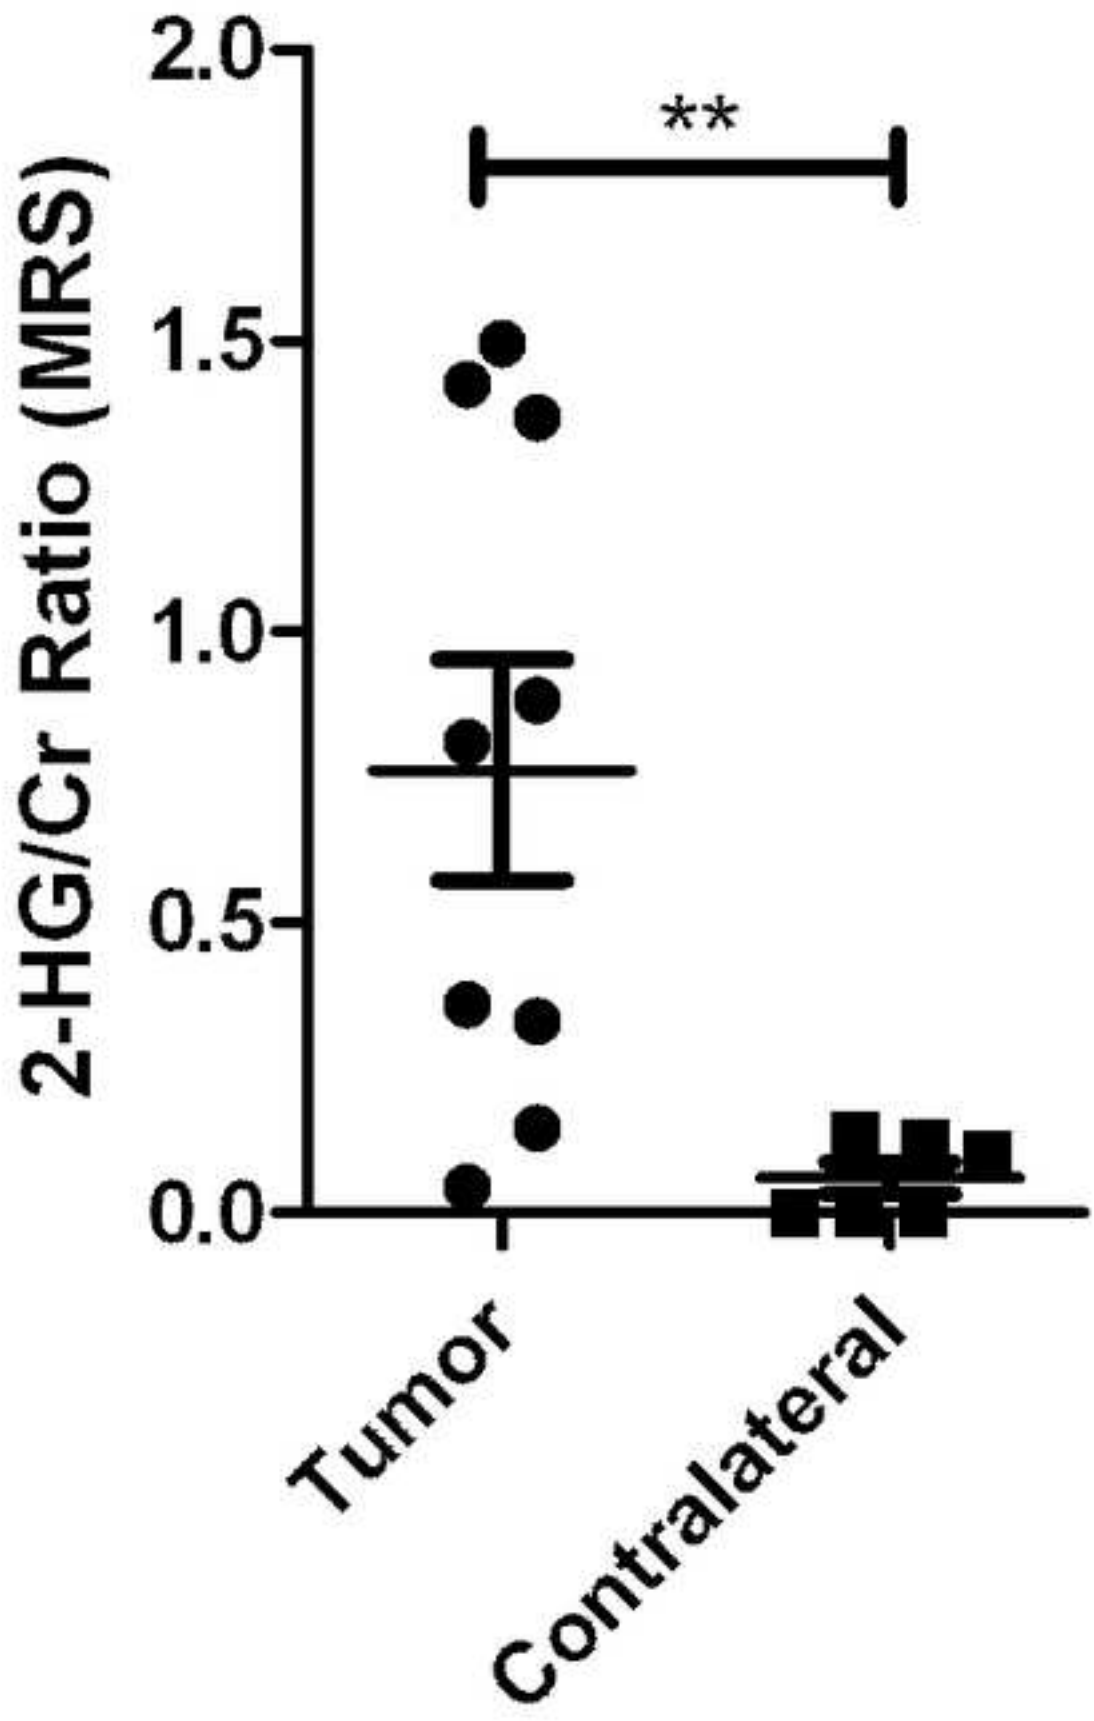

Supplement: NIHMS449142-supplement-Supplemental_Figures.pdf [file NIHMS449142-supplement-Supplemental_Figures.pdf]
