# Supplementary material
Source: PubMed Central journal article supplement (PMC3650613)
Supplement: NIHMS449142-supplement-Supplemental_Table_1.pdf [file NIHMS449142-supplement-Supplemental_Table_1.pdf]

**Supplementary Table.1.****List of metabolites, lipids (Lip) and macromolecules (MM) quantified by LC Model**

| S.No | Metabolite Name             | Acronyms |
|------|-----------------------------|----------|
| 1    | Alanine                     | Ala      |
| 2    | Aspartate                   | Asp      |
| 3    | Creatine                    | Cr       |
| 4    | Phophocreatine              | PCr      |
| 5    | Gamma-Aminobutyric acid     | GABA     |
| 6    | Glucose                     | Glc      |
| 7    | Glutamine                   | Gln      |
| 8    | Glutamate                   | Glu      |
| 9    | Glycerophophocholine        | GPC      |
| 10   | Phosphocholine              | PCh      |
| 11   | Glutathione                 | GSH      |
| 12   | 2-Hydroxyglutarate          | 2HG      |
| 13   | myo-inositol                | Ins      |
| 14   | Lactate                     | Lac      |
| 15   | N-acetylaspartate           | NAA      |
| 16   | N-acetylaspartate glutamate | NAAG     |
| 17   | Phophoethanolamine          | PE       |
| 18   | Scyllo-inositol             | Scyllo   |
| 19   | Taurine                     | Tau      |
| 20   | Guanine                     | Gua      |
| 25   | Lipid 13a                   | Lip 13a  |
| 26   | Lipid 13b                   | Lip 13b  |
| 27   | Lipid 09                    | Lip 09   |
| 28   | Lipid 20                    | Lip 20   |
| 29   | Macromolecules 09           | MM 09    |
| 30   | Macromolecules 12           | MM 12    |
| 29   | Macromolecules 14           | MM 14    |
| 30   | Macromolecules 17           | MM 17    |
| 30   | Macromolecules 20           | MM 20    |
